# Supplementary material for: Ets-1 mediates upregulation of Mcl-1 downstream of XBP-1 in human melanoma cells upon ER stress
Source: PubMed Central journal article supplement — Oncogene. 2011 Mar 21;30(34):3716–26. doi: 10.1038/onc.2011.87 (PMC3163261; doi:10.1038/onc.2011.87), 2011-03-21
Supplement: onc201187x1.pdf [file onc201187x1.pdf]

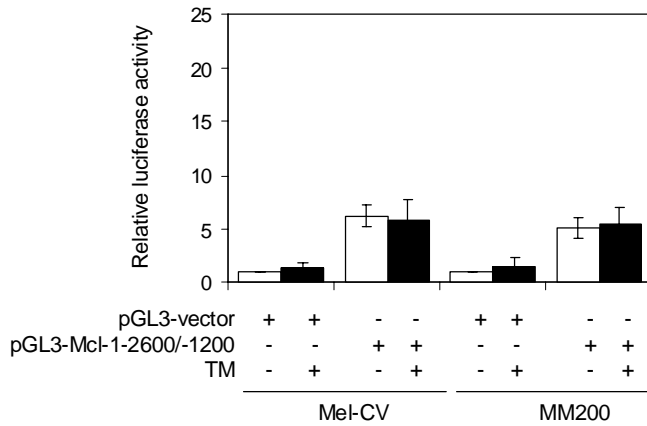

**Supplementary Figure S1:** The region -2600/-1200 of the Mcl-1 promoter is not transcriptionally responsive to ER stress. Mel-CV and MM200 cells were transiently transfected with the luciferase reporter pGL3-Mcl-1-2600/-1200. Twenty-four hours later, cells were treated with TM (3 $\mu$ M) for a further 16 hours. The luciferase activity was measured using a dual luciferase reporter assay system in a multi-detection microplate reader. The data shown are the mean  $\pm$  SE of three individual experiments.

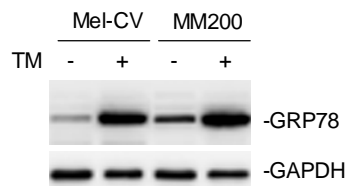

**Supplementary Figure S2:** Induction of ER stress by tunicamycin (TM). Whole cell lysates from Mel-CV and MM200 cells treated with TM (3 $\mu$ M) for 16 hours were subjected to Western blot analysis of GRP78 and GAPDH (as a loading control).

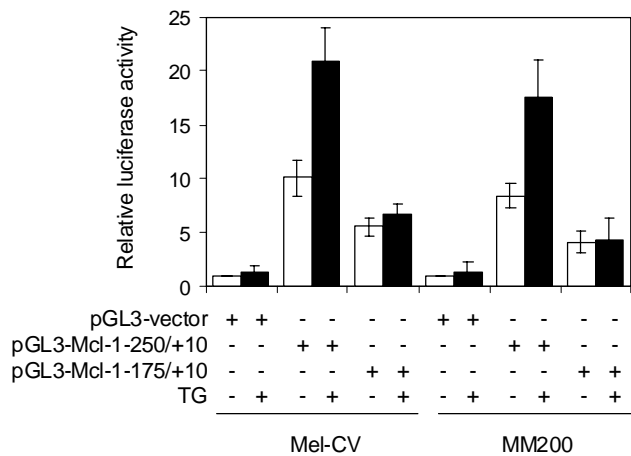

**Supplementary Figure S3:** The region -250/-175 is transcriptionally responsive to thapsigargin (TG). Mel-CV and MM200 cells were transiently transfected with luciferase reporter constructs, respectively, as indicated. Twenty-four hours later, cells were treated with TG (1 $\mu$ M) for a further 16 hours. The luciferase activity was measured using a dual luciferase reporter assay system in a multi-detection microplate reader. The data shown are the mean  $\pm$  SE of three individual experiments.

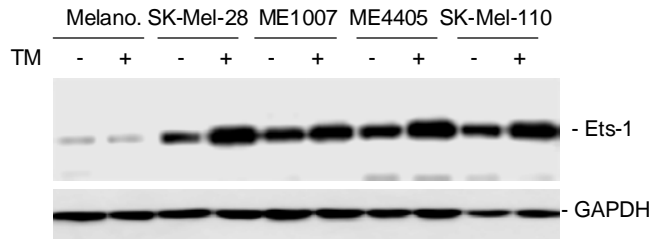

**Supplementary Figure S4:** ER stress up-regulates Ets-1 in melanoma cells but not in melanocytes (melano.) Melanocytes and cells from the indicated melanoma cell lines were treated with TM (3 $\mu$ M) for 16 hours. Whole cell lysates were subjected to Western blot analysis of Ets-1 and GAPDH (as a loading control). The data shown are representative of three individual Western blot analyses.

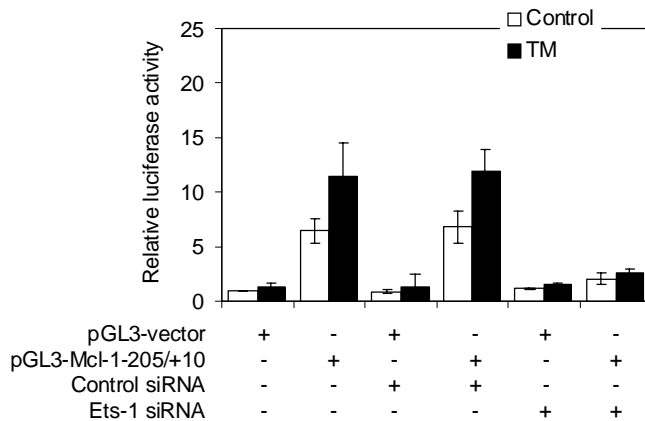

**Supplementary Figure S5:** Inhibition of Ets-1 blocks TM-induced transcriptional activity of the region -205/+10 of the Mcl-1 promoter in MM200 cells. Cells were co-transfected with the Ets-1 siRNA and the pGL3-basic based luciferase reporter constructs, pGL3-vector and pGL3-Mcl-1-205/+10 of the Mcl-1 promoter, respectively. Twenty-four hours later, cells were treated with TM (3 $\mu$ M) for a further 16 hours. The luciferase activity was measured using a dual luciferase reporter assay system in a multi-detection microplate reader.

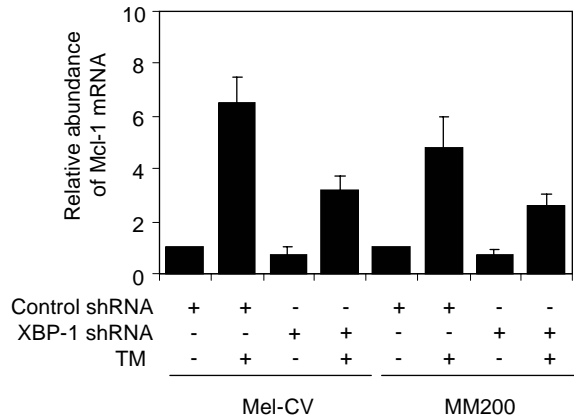

**Supplementary Figure S6:** Mel-CV and MM200 cells were transfected with the control and XBP-1 shRNA, respectively. Total RNA was subjected to qPCR analysis for Mcl-1 mRNA expression. The relative abundance of mRNA expression in cells carrying the control shRNA without treatment with TM was arbitrarily designated as 1. The efficiency of inhibition of XBP-1 is shown in Figure 5C in the main text.

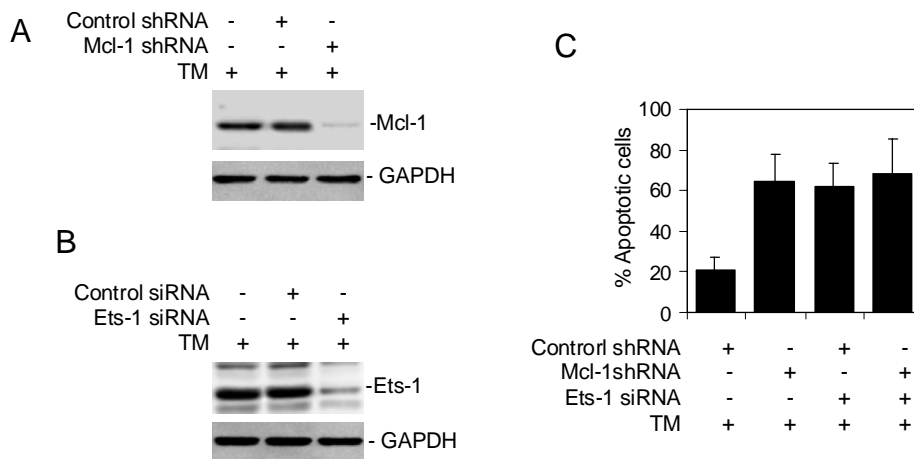

**Supplementary Figure S7:** Sensitization of melanoma cells to ER stress-induced apoptosis by knockdown of Ets-1 can not be further enhanced by inhibition of Mcl-1. A, the expression of Mcl-1 in MM200 cells stably transfected with the control or Mcl-1 shRNA was measured in Western blot analysis. B, MM200 cells with Mcl-1 stably knocked down by shRNA were transfected with the control or Ets-1 siRNA. Twenty-four hours later, whole cell lysates were subjected to Western blot analysis of Ets-1 and GAPDH (as a loading control). C, MM200 cells with Mcl-1 stably knocked down by shRNA were transfected with the control or Ets-1 siRNA. Twenty-four hours later, cells were treated with TM (3 $\mu$ M) for a further 48 hours. Apoptosis was quantitated by the propidium iodide method. The data shown are either representative of three individual Western blot analyses (A & B), or the mean  $\pm$  SE of three individual experiments (C).

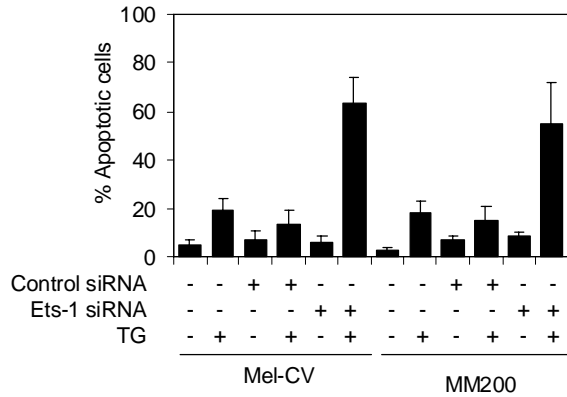

**Supplementary Figure S8:** Inhibition of Ets-1 sensitizes melanoma cells to thapsigargin (TG)-induced apoptosis. Mel-CV and MM200 cells were transfected with the control and Ets-1 siRNA, respectively, as shown in Figure 4A. Twenty-four hours later, cells were treated with TG (1 $\mu$ M) for a further 48 hours. Apoptosis was quantitated by the propidium iodide method. The data shown are the mean  $\pm$  SE of three individual apoptotic assays.

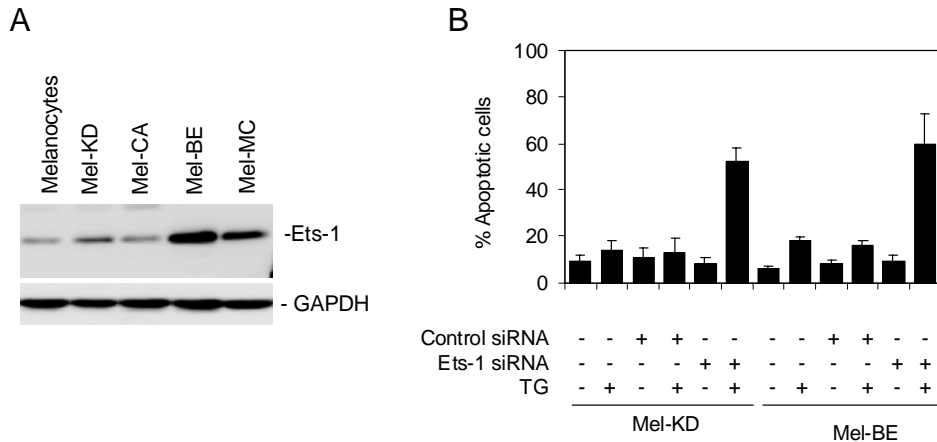

**Supplementary Figure S9:** A, fresh melanoma isolates express relatively high levels of Ets-1. Whole cell lysates from melanocytes and fresh melanoma isolates were subjected to Western blot analysis of Ets-1 and GAPDH (as a loading control). B, Inhibition of Ets-1 sensitizes melanoma cells to thapsigargin (TG)-induced apoptosis. Mel-KD and Mel-BE freshly isolated melanoma cells were transfected with the control and Ets-1 siRNA, respectively, as shown in Figure 6E. Twenty-four hours later, cells were treated with TG (1 $\mu$ M) for a further 48 hours. Apoptosis was quantitated by the propidium iodide method. The data shown are either three individual Western blot analyses, or the mean  $\pm$  SE of three individual apoptotic assays.
